# Supplementary material
Source: Elsevier journal article supplement (https://www.sciencedirect.com/science/article/pii/S1413867018302228)
Supplement: mmc1 [file S1413867018302228:mmc1.docx]

Table S1. General characteristics of patients who were evaluated for HBV subgenotype

| Id | Subgenotype | Viral load* | Sex | Ancestry | | | |
| --- | --- | --- | --- | --- | --- | --- | --- |
| Grandfather** | Grandmother** | Grandfather*** | Grandmother*** |
| BG-6 | D3 | 5.03 | female | Italian | Italian | Italian | Italian |
| BG-10 | D3 | 4.47 | male | Italian | Italian | Italian | Italian |
| BG-18 | D2 | 6.62 | female | Unknown | Unknown | Unknown | Italian |
| BG-20 | D2 | 4.60 | male | Unknown | Unknown | Unknown | Unknown |
| BG-28 | D3 | 3.68 | male | Unknown | Unknown | Unknown | Unknown |
| BG-30 | D2 | 5.12 | female | Italian | Italian | Italian | Italian |
| BG-35 | D3 | 4.24 | male | Italian | Italian | Italian | Italian |
| BG-36 | D3 | 4.64 | female | Italian | Italian | Italian | Italian |
| BG-41 | D3 | 7.63 | female | German | German | German | German |
| BG-42 | D3 | 4.05 | female | Italian | Italian | Italian | Italian |
| BG-43 | D3 | 2.97 | male | Italian | Italian | Italian | Italian |
| BG-46 | D3 | 6.33 | male | Italian | Italian | Italian | Italian |
| BG-47 | D3 | 4.21 | male | Italian | Italian | Italian | Italian |
| BG-48 | D3 | 4.24 | male | Italian | Italian | Italian | Italian |
| BG-67 | D3 | 7.01 | male | Polish | Polish | Polish | Polish |
| BG-69 | D3 | 5.76 | male | Italian | Italian | Italian | Italian |
| BG-89 | D3 | 7.78 | female | Italian | Italian | Italian | Italian |
| BG-90 | D3 | 8.23 | female | Italian | Italian | Polish | Polish |
| BG-96 | D3 | 5.24 | male | German | German | German | German |
| BG-99 | D3 | 6.95 | male | German | German | Brazilian | Brazilian |
| BG-107 | D3 | 5.85 | male | Italian | Italian | Italian | Italian |

* in log UI/ml

**maternal

***paternal
